# Symptoms of depression and anxiety among Vietnamese immigrants in Japan during the COVID-19 pandemic: a cross-sectional web-based study

Tadashi Yamashita<sup>a</sup>, Pham Nguyen Quy<sup>b</sup>, Emi Nogami<sup>c</sup>, Erina Seto-Suh<sup>d</sup>, Chika Yamada<sup>e</sup>, Saori Iwamoto<sup>a</sup>, Kyoko Shimazawa<sup>a</sup>, Kenji Kato<sup>a</sup>

<sup>a</sup> Faculty of Nursing, Kobe City College of Nursing

<sup>b</sup> Department of Medical Oncology, Kyoto Miniren Central Hospital

<sup>c</sup> Institute for Promotion of Higher Education, Kobe university

<sup>d</sup> Human Rights Research Institute, Kindai University

<sup>e</sup> Department of Environmental Coexistence, Center for Southeast Asian Studies, Kyoto University

Corresponding author: Tadashi Yamashita. E-mail: [yamashita@tr.kobe-ccn.ac.jp](mailto:yamashita@tr.kobe-ccn.ac.jp)

## ABSTRACT

**Objective:** We aimed to examine the mental health status and related factors among Vietnamese immigrants in Japan during the coronavirus disease 2019 (COVID-19) pandemic.

**Design:** Online cross-sectional survey administered from September 21 to October 21, 2021

**Setting:** Online survey of Vietnamese immigrants in Japan

**Participants:** The inclusion criteria for participation were 1) Vietnamese citizenship or Japanese citizenship in those of Vietnamese descent, current residence in Japan, and 2) age  $\geq 18$  years.

**Main Outcomes:** Patient Health Questionnaire-9 (PHQ-9) and Generalized Anxiety Disorder 7-item (GAD-7) scores were considered the main outcome measures. Multivariable logistic regression was used to identify factors related to symptoms of depression and anxiety, and the

**NOTE:** This preprint reports new research that has not been certified by peer review and should not be used to guide clinical practice.

chosen variables were entered simultaneously in the survey.

**Results:** Among 621 participants (age: 26.0±4.8 years; male: 347 [55.9%]) who completed the questionnaire, 73.7% reported a decrease in income when compared with the period before the COVID-19 pandemic, and 60.4% reported being recently affected by poor socioeconomic status. Moderate-to-severe symptoms of depression (PHQ-9 score  $\geq 10$  points) and mild-to-severe symptoms of anxiety (GAD-7  $\geq 5$  points) were observed in 203 (32.7%) and 285 (45.9%) individuals, respectively. Factors related to depressive symptoms were age (odds ratio [OR]=0.94,  $p=0.043$ ), medical or psychiatric co-morbidity (OR=2.46,  $p<0.001$ ), and low socioeconomic status (OR=2.47,  $p<0.001$ ). Factors related to anxiety symptoms were being single (OR=1.72,  $p=0.044$ ), medical or psychiatric co-morbidity (OR=2.52,  $p<0.001$ ), low socioeconomic status (OR=2.72,  $p<0.001$ ), and absence of a partner with whom to discuss one's health (OR=1.66,  $p=0.013$ ).

**Conclusions:** The current findings demonstrate that, when compared with Japanese citizens, Vietnamese immigrants experienced a decrease in income, worsening working conditions, and poor mental health status during the COVID-19 pandemic. These findings highlight the potential contribution of low socioeconomic status and social isolation to poor mental health status.

## **Strengths and limitations of this study**

- Vietnamese immigrants, who are the second largest immigrant group in Japan, were studied. No previous assessment of their mental health during the COVID-19 pandemic has been carried out.
- This study provided a non-contact approach to prevent infection using online surveys. Therefore, we received a wide range of responses from areas with low COVID-19 infection rate area to high COVID-19 infection rate area in Japan.
- The survey may not be a complete representation of all Vietnamese immigrants living in Japan, as some elderly Vietnamese immigrants may not have been able to participate due to the online format.

## **Keywords**

Mental health, Depression, Anxiety, Immigrants, Vietnamese in Japan, COVID-19

## INTRODUCTION<sup>1</sup>

The number of foreign residents in Japan has continued to increase annually, totalling approximately 2,830,000 as of June 2021. Specifically, there has been a rapid increase in the number of Vietnamese immigrants, the population of which has increased from 10,000 in 1990 to 450,000 in 2021. The Immigration Services Agency of Japan recently reported that the country includes the second-largest number of Vietnamese immigrants after China, which can be attributed in part to the Technical Intern and Training Program adopted in Japan in 1993.[1] Additionally, in 2008, Japan introduced the 300,000 International Students Plan supervised by the Ministry of Education, Culture, Sports, Science, and Technology, which has improved the acceptance system utilised by Japanese universities and other institutions. However, Vietnamese residents in Japan face stress at work and in other activities due to socio-cultural differences.[2]

The coronavirus disease 2019 (COVID-19) pandemic has had a severe impact on health and society worldwide. In Japan, approximately 17 million people have been infected with COVID-19, resulting in approximately 18,000 deaths by December 2021.[3] The pandemic has also affected the lives of Vietnamese immigrants living in Japan, who already hold a marginalised and precarious position, by reducing working hours and increasing layoffs. Furthermore,

---

<sup>1</sup> Abbreviations: PHQ-9: Patient Health Questionnaire-9; GAD-7: Generalized Anxiety Disorder-7; SD: standard deviation; OR: odds ratio; CI: confidence interval

temporary restrictions on returning to Vietnam may have significantly affected mental health among immigrants. In January 2021, the Ministry of Health, Labour, and Welfare provided emergency assistance to foreign residents exhibiting need in Japan, including facilitating early return to Vietnam and providing economic support.[4]

Studies conducted during the COVID-19 pandemic have recently reported mental health crises among immigrants in the US,[5] Canada,[6] Europe,[7] India,[8] and South Korea.[9] However, the mental health status of immigrants in Japan during the COVID-19 epidemic remains unclear. Students from China have reported anxiety regarding COVID-19 prevention in Japan,[10] and approximately 70% of Chinese immigrants have expressed concerns regarding COVID-19 infection.[11] Vietnamese immigrants in Japan may have similar concerns regarding COVID-19.

Since mental health among immigrants in Japan may be related to aspects of COVID-19 infection as well as pandemic-related lifestyle changes, investigating mental health status among Vietnamese residents—the second-largest foreign community in Japan—remains an important public health concern. Examining the relationship between socioeconomic factors and mental health among Vietnamese residents in Japan may also aid in the modification and development of health care policies. Therefore, to identify factors that may influence mental health status, the present study aimed to investigate symptoms of depression and anxiety among Vietnamese immigrants in Japan during the COVID-19 pandemic.

## **MATERIALS AND METHODS**

This study was approved by the Kobe City College of Nursing Ethics Research Committee (approval number: 20124-05).

### **Design and sampling**

This cross-sectional survey was conducted among Vietnamese immigrants in Japan from September 21 to October 21, 2021. During the survey, Japan was in the latter half of the fifth COVID-19 wave. To prevent COVID-19 spread through contact, we conducted an online survey using SurveyMonkey. Since >70% of Vietnamese people use the Internet,[12] we conducted the survey using social networks as the main distribution platform. A one-page participants information statement, which also served as a recruitment poster, was posted in Facebook groups and on the personal accounts of the researchers. This statement briefly explained the study background, purpose, and procedure; voluntary nature of participation; anonymity of the questionnaire; strict privacy protection practices; and how to complete the questionnaire. It also included the statement, "By submitting the online questionnaire, the participant agrees that he/she has read and understands the participants information statement and agrees to participate in the survey". The inclusion criteria for participation were as follows: Vietnamese citizenship or Japanese citizenship in those of Vietnamese descent, current

residence in Japan, and age  $\geq 18$  years. Participants received an online token for 200 Japanese yen (\$1.8) after participation.

### **Data collection tools**

The survey involved a self-administered questionnaire, which was used to collect data regarding demographic variables such as sex, age, duration of residence in Japan, area of residence, marital status, education level, birth country, visa status, Japanese language skill, and medical or psychiatric co-morbidity. Based on the opinions of Japanese infectious disease experts, we also classified residence into three categories based on the number of COVID-19 infections as of December 2021 ( $>2,000$  per 100,000: Tokyo, Osaka, Okinawa; 1,999–1,000 per 100,000: Hokkaido, Saitama, Chiba, Kanagawa, Aichi, Kyoto, Nara, Hyogo, Fukuoka;  $<999$  per 100,000: Others).

Economic and employment status was assessed based on national health insurance, public assistance, annual household income, and monthly income compared with that before the COVID-19 pandemic. Social support status was assessed based on whether patients had partners with whom to talk about their health. Levels of depression and anxiety were assessed using the Patient Health Questionnaire-9 (PHQ-9) and Generalized Anxiety Disorder 7-item (GAD-7), respectively, which have been validated for assessing mental health status in Vietnam.[13-18] In our study, the Cronbach's alpha values for the reliability of the PHQ-9 and

GAD-7 were 0.844 and 0.933, respectively.

## Statistical analysis

We performed descriptive analyses using means and standard deviations for continuous variables as well as counts and percentages for binary or categorical variables. Each PHQ-9 item was rated on a three-point Likert scale ranging from 0 (not at all) to 3 (almost every day), with the total score ranging from 0 to 27. The severity of depression was divided into five categories based on PHQ-9 scores, as follows: none (0–4 points), mild (5–9 points), moderate (10–14 points), severe (15–19 points), and extremely severe (20–27 points).[19] A PHQ-9 score  $\geq 10$  points was considered to indicate the presence of depressive symptoms, based on a previous survey of COVID-19 in Vietnam.[13,15-17] The severity of anxiety was classified into four categories based on GAD-7 scores: no anxiety (0–4 points), mild (5–9 points), moderate (10–14 points), and severe (15–21 points).[20] Each question item ranges from 0 (not at all) to 3 (almost every day) on a 3-point Likert scale, and the total score ranged from 0 to 21. GAD-7 scores  $\geq 5$  were considered to indicate the presence of anxiety symptoms, as previously reported.[14,18]

We conducted multivariable logistic regression analysis (forced-entry method) to identify factors related to symptoms of depression and anxiety, which were used as the dependent variables. The potential predictors included sociodemographic variables such as age, sex,



marital status, education level, medical or psychiatric co-morbidity; immigrant-specific variables such as the duration of residence in Japan, visa status, Japanese language proficiency; economic variables; variables related to the COVID-19 pandemic such as the rate of COVID-19 infection in the area; and variables related to social connectedness, such as the availability of a conversation partner. Inclusion of variables was based on previous studies of mental health among immigrants,[21,22] and the chosen variables were entered simultaneously for multivariable regression. We created a correlation matrix before entering the independent variables; further, we confirmed that there were no strong correlations among the independent variables with  $r > 0.80$ . Statistical analyses were performed using the Statistical Package for the Social Sciences version 19.0. Statistical significance was set at  $P < 0.05$  (2-sided tests).

## RESULTS

A total of 1,046 people participated in the online survey, with 652 participants providing complete responses. After deleting responses with missing values or outliers, we included 621 responses. All participants were Vietnamese. The mean age ( $\pm$  standard deviation [SD]) was  $26.0 \pm 4.8$  years; further, the mean duration of residence in Japan ( $\pm$  SD) was  $3.4 \pm 3.1$  years. Approximately 30% of the respondents lived in areas with high infection rates. Most respondents (79.2%) were single (including divorced or bereaved), and almost all were born in Vietnam (99.0%). The most common visa status was "technical intern training (Ginjojisshu)"

(29.5%), followed by "international student" (29.3%) and "status of residence based on employment" (26.9%). The most common educational level was high school (38.3%), followed by college or university (34.5%) and technical school (21.3%). Further, 21.3% of respondents had a medical or psychiatric co-morbidity, and the most common was stomach / oesophagus / duodenum (5.5%), followed by otorhinolaryngology (5.2%) and musculoskeletal / joint disease (5.2%) (Table 1).

**Table 1:** Participant characteristics (n = 621)

| Variable                                         | Item                                                                              | n              | %    |
|--------------------------------------------------|-----------------------------------------------------------------------------------|----------------|------|
| Sex                                              | Male                                                                              | 347            | 55.9 |
|                                                  | Female                                                                            | 274            | 44.1 |
| Age                                              | (Mean $\pm$ SD)                                                                   | 26.0 $\pm$ 4.8 |      |
| Duration of residence in Japan                   | (Mean $\pm$ SD)                                                                   | 3.4 $\pm$ 3.1  |      |
| COVID-19 infection rate in the area of residence | Low                                                                               | 181            | 29.1 |
|                                                  | Middle                                                                            | 251            | 40.4 |
|                                                  | High                                                                              | 189            | 30.4 |
| Marital status                                   | Married                                                                           | 129            | 20.8 |
|                                                  | Single, divorced, or bereaved                                                     | 492            | 79.2 |
| Country of birth                                 | Vietnam                                                                           | 615            | 99.0 |
|                                                  | Japan                                                                             | 4              | 0.6  |
|                                                  | Other                                                                             | 2              | 0.3  |
| Visa status                                      | Residence based on the nature of activities                                       | 26             | 4.2  |
|                                                  | Residence based on employment except Technical Intern Training and Skilled Labour | 167            | 26.9 |
|                                                  | International student                                                             | 182            | 29.3 |
|                                                  | Technical Intern Training (Ginjojisshu)                                           | 183            | 29.5 |
|                                                  | Skilled Labour (Tokuteiginou)                                                     | 38             | 6.1  |

|                                                     |        |                                                                |     |      |
|-----------------------------------------------------|--------|----------------------------------------------------------------|-----|------|
|                                                     |        | No response                                                    | 25  | 4.0  |
| Japanese language proficiency                       |        | Ability to speak fluently and confidently                      | 71  | 11.4 |
|                                                     |        | Ability to speak at a level that does not affect work or study | 273 | 44.0 |
|                                                     |        | Adequate ability to speak without impacting daily life         | 217 | 34.9 |
|                                                     |        | Barely able to speak Japanese                                  | 60  | 9.7  |
|                                                     |        |                                                                |     |      |
| Education level                                     |        | Junior high school and under                                   | 5   | 0.8  |
|                                                     |        | High school                                                    | 238 | 38.3 |
|                                                     |        | Technical school                                               | 132 | 21.3 |
|                                                     |        | College (two years) or University                              | 214 | 34.5 |
|                                                     |        | Graduate school                                                | 32  | 5.2  |
| Medical or psychiatric morbidity                    | or co- | Yes                                                            | 132 | 21.3 |
|                                                     |        | No                                                             | 489 | 78.7 |
| Medical or psychiatric morbidity (Multiple answers) | or co- | Stomach / oesophagus / duodenum                                | 34  | 5.5  |
|                                                     |        | Otorhinolaryngology                                            | 32  | 5.2  |
|                                                     |        | Musculoskeletal / joint                                        | 32  | 5.2  |
|                                                     |        | Dental                                                         | 31  | 5.0  |
|                                                     |        | Psychiatric disorders                                          | 25  | 4.0  |
|                                                     |        | Blood                                                          | 12  | 1.9  |
|                                                     |        | Hyperlipidaemia                                                | 10  | 1.6  |
|                                                     |        | High blood pressure                                            | 9   | 1.4  |
|                                                     |        | Enteropathy                                                    | 8   | 1.3  |
|                                                     |        | Gynaecology                                                    | 8   | 1.3  |
|                                                     |        | Hepatobiliary tract                                            | 7   | 1.1  |
|                                                     |        | Male reproductive organs                                       | 7   | 1.1  |
|                                                     |        | Kidney disease                                                 | 5   | 0.8  |
|                                                     |        | Urinary system                                                 | 5   | 0.8  |
|                                                     |        | Heart disease                                                  | 4   | 0.6  |
|                                                     |        | Lung disease                                                   | 4   | 0.6  |
|                                                     |        | Diabetes mellitus                                              | 3   | 0.5  |
|                                                     |        | Neuropathy                                                     | 3   | 0.5  |
|                                                     |        | Cancer                                                         | 2   | 0.3  |

Regarding economic status, <5.5% and 6.9% of respondents lacked national health insurance

and used public assistance, respectively. Most participants (70.7%) had an annual household income <2.99 million yen (\$ 26 thousands). Approximately 34.6% of respondents reported a decrease in monthly income when compared with the period before the COVID-19 pandemic, with approximately 39.1% reporting a slight decrease. Approximately 14.2% and 46.2% of participants reported very poor and poor socioeconomic status, respectively. Additionally, 18.7% of respondents reported dismissal from work/unemployment during the COVID-19 pandemic, while 64.1% reported a reduction in the number of working days (Table 2).

**Table 2:** Economic and employment status\* (n = 621)

| Variable                                               | Item                                    | n   | %    |
|--------------------------------------------------------|-----------------------------------------|-----|------|
| National health insurance                              | Yes                                     | 587 | 94.5 |
|                                                        | No                                      | 34  | 5.5  |
| Public assistance                                      | Used                                    | 43  | 6.9  |
|                                                        | Not used                                | 578 | 93.1 |
| Household income per year                              | <2.99 million yen (\$ 26 thousands)     | 439 | 70.7 |
|                                                        | 3–5.99 million yen (\$ 26 -52 thousand) | 54  | 8.7  |
|                                                        | >6 million yen (\$ 52 thousands)        | 22  | 3.5  |
|                                                        | No response                             | 106 | 17.1 |
|                                                        |                                         |     |      |
| Monthly income when compared with that before COVID-19 | Decrease of $\geq 40\%$                 | 215 | 34.6 |
|                                                        | Decrease of 10–40%                      | 243 | 39.1 |
|                                                        | Decrease <10%                           | 146 | 23.5 |
|                                                        | Increase >10–40%                        | 15  | 2.4  |
|                                                        | Increase >40%                           | 2   | 0.3  |
| Socioeconomic status                                   | Really good                             | 5   | 0.8  |
|                                                        | Slightly better                         | 47  | 7.6  |
|                                                        | General                                 | 194 | 31.2 |
|                                                        | Slightly difficult                      | 287 | 46.2 |
|                                                        | Very difficult                          | 88  | 14.2 |
| Employment status (multiple answers)                   | No change/no impact                     | 93  | 15.0 |
|                                                        | Dismissal/Unemployment                  | 116 | 18.7 |
|                                                        | Change in occupation type               | 76  | 12.2 |
|                                                        | Change in work content                  | 101 | 16.3 |
|                                                        | Reduction in working days               | 398 | 64.1 |
|                                                        | Increase in working days                | 17  | 2.7  |

|       |    |     |
|-------|----|-----|
| Other | 44 | 7.1 |
|-------|----|-----|

\* International students were included in the statistical analysis for “Economic and employment status” since they are allowed to have part-time jobs in Japan.

Further, 30.3% of participants reported having a partner with whom to discuss their health, with family (21.9%) being the most common, followed by Vietnamese friends (9.4%), work colleagues (8.7%), and medical professionals (including through online consultation) (4.3%) (Table 3).

**Table 3:** Social support status (n = 621)

| Variable                                                                     | Item                                                          | n   | %    |
|------------------------------------------------------------------------------|---------------------------------------------------------------|-----|------|
| Partner with whom to discuss health status                                   | Yes                                                           | 188 | 30.3 |
|                                                                              | No                                                            | 433 | 69.7 |
| Who is the partner with whom you can discuss your health? (Multiple answers) | Family                                                        | 136 | 21.9 |
|                                                                              | Japanese friend                                               | 21  | 3.4  |
|                                                                              | Vietnamese friend                                             | 59  | 9.5  |
|                                                                              | People at the same office                                     | 54  | 8.7  |
|                                                                              | People at the same school                                     | 15  | 2.4  |
|                                                                              | Medical professionals (including through online consultation) | 27  | 4.3  |
|                                                                              | Religious facilities (temples, churches, etc.)                | 4   | 0.6  |
|                                                                              | Other                                                         | 23  | 3.7  |

The mean PHQ-9 score was  $7.9 \pm 6.0$ . Mild, moderate, severe, and very severe depressive symptoms were observed in 212 (34.1%), 117 (18.8%), 52 (8.4%), and 34 (5.5%) participants, respectively. Further, 203 (32.7%) individuals had a PHQ-9 score  $\geq 10$  points. The mean GAD-7 score was  $5.4 \pm 5.3$ . Mild, moderate, and severe symptoms of anxiety were observed in 169 (27.2%), 69 (11.1%), and 47 (7.6%) participants, respectively. Moreover, 285 (45.9%) individuals had a GAD-7 score  $\geq 5$  points (Table 4).

**Table 4:** Symptoms of depression and anxiety (n = 621)

| Variable                    | Item                       | n             | %    |
|-----------------------------|----------------------------|---------------|------|
| Depressive symptoms (PHQ-9) | Mean $\pm$ SD              | 7.9 $\pm$ 6.0 |      |
|                             | No depression (0–4 points) | 206           | 33.2 |
|                             | Mild (5–9 points)          | 212           | 34.1 |
|                             | Moderate (10–14 points)    | 117           | 18.8 |
|                             | Severe (15–19 points)      | 52            | 8.4  |
|                             | Very severe (20–27 points) | 34            | 5.5  |
|                             | 10–27 points               | 203           | 32.7 |
| Anxiety symptoms (GAD-7)    | Mean $\pm$ SD              | 5.4 $\pm$ 5.3 |      |
|                             | No anxiety (0–4 points)    | 336           | 54.1 |
|                             | Mild (5–9 points)          | 169           | 27.2 |
|                             | Moderate (10–14 points)    | 69            | 11.1 |
|                             | Severe (15–21 points)      | 47            | 7.6  |
|                             | 5–21 points                | 285           | 45.9 |

We performed a multivariable logistic regression analysis by the forced-entry method. Twenty-five participants with missing responses for residency status were considered as missing values. The results of the  $\chi^2$  test were significant ( $P < 0.001$ ) for the PHQ-9 and GAD-7 regression models. The Hosmer and Lemeshow's test for PHQ-9 and GAD-7 scores revealed P values of 0.671 and 0.194, respectively, and the goodness-of-fit for the model was acceptable. Additionally, there were no outliers in which the predicted values exceeded the measured values by  $\pm 3$  SD. Depressive symptoms were associated with older (odds ratio [OR]= 0.94, 95% confidence interval [CI]= 0.89, 0.99), medical or psychiatric co-morbidity (OR=2.46, 95% CI=1.61, 3.76), and low socioeconomic status (OR=2.47, 95% CI=1.64, 3.71). Factors related to anxiety included being single (OR=1.72, 95% CI=1.01, 2.93), medical or psychiatric co-morbidity (OR=2.52, 95% CI=1.63, 3.88), low socioeconomic status (OR=2.72, 95% CI=1.87, 3.97), and not having a partner with whom to discuss one's health (OR=1.66, 95% CI=1.11, 2.47) (Table 5).

**Table 5:** Factors associated with symptoms of depression and anxiety (n = 596)

|                                |                                        | Depressive symptoms (PHQ-9) |       |         | Anxiety symptoms (GAD-7) |       |         |
|--------------------------------|----------------------------------------|-----------------------------|-------|---------|--------------------------|-------|---------|
|                                |                                        | Odds [95% CI]               | Beta  | P       | Odds [95% CI]            | Beta  | P       |
| Age                            |                                        | 0.94 [0.89, 0.99]           | -0.06 | 0.043 * | 0.97 [0.92, 1.03]        | -0.03 | 0.348   |
| Duration of residence in Japan |                                        | 1.08 [0.99, 1.17]           | 0.08  | 0.084   | 1.03 [0.95, 1.12]        | 0.03  | 0.441   |
| Sex                            | Female                                 | 1.00 (reference)            |       |         | 1.00 (reference)         |       |         |
|                                | Male                                   | 0.92 [0.63, 1.34]           | -0.09 | 0.656   | 1.09 [0.76, 1.57]        | 0.09  | 0.640   |
| Marital status                 | Married                                | 1.00 (reference)            |       |         | 1.00 (reference)         |       |         |
|                                | Single, divorced, or bereaved          | 1.61 [0.90, 2.88]           | 0.48  | 0.109   | 1.72 [1.01, 2.93]        | 0.55  | 0.044 * |
| Visa status                    | Residence based on status and position | 1.00 (reference)            |       |         | 1.00 (reference)         |       |         |
|                                | Residence based on employment          | 2.46 [0.56, 10.82]          | 0.90  | 0.233   | 2.51 [0.67, 9.37]        | 0.92  | 0.172   |
| Japanese language proficiency  | Ability to speak well/to some extent   | 1.00 (reference)            |       |         | 1.00 (reference)         |       |         |
|                                | Barely able to speak                   | 1.01 [0.50, 2.00]           | 0.01  | 0.990   | 0.78 [0.40, 1.53]        | -0.24 | 0.474   |
| Education level                | College, University, or higher         | 1.00 (reference)            |       |         | 1.00 (reference)         |       |         |
|                                | Technical school                       | 1.16 [0.71, 1.91]           | 0.15  | 0.549   | 1.05 [0.66, 1.69]        | 0.05  | 0.831   |

|                 |                             |                   |        |       |        |                   |       |           |
|-----------------|-----------------------------|-------------------|--------|-------|--------|-------------------|-------|-----------|
|                 |                             | 1.91]             |        |       |        |                   |       |           |
|                 | High school or lower        | 0.94              | [0.59, | -0.07 | 0.784  | 1.20 [0.77, 1.86] | 0.18  | 0.423     |
|                 |                             | 1.49]             |        |       |        |                   |       |           |
| Medical or      | No                          | 1.00 (reference)  |        |       |        | 1.00 (reference)  |       |           |
| psychiatric co- | Yes                         | 2.46              | [1.61, | 0.90  | <0.001 | 2.52 [1.63, 3.88] | 0.92  | <0.001 ** |
| morbidity       |                             | 3.76]             |        |       | **     |                   |       |           |
| Low             | General or better           | 1.00 (reference)  |        |       |        | 1.00 (reference)  |       |           |
| socioeconomic   | Difficult or very difficult | 2.47              | [1.64, | 0.90  | <0.001 | 2.72 [1.87, 3.97] | 1.00  | <0.001 ** |
| status          |                             | 3.71]             |        |       | **     |                   |       |           |
| COVID-19        | Low                         | 1.00 (reference)  |        |       |        | 1.00 (reference)  |       | 0.654     |
| infection rate  | Middle                      | 0.97              | [0.62, | -0.03 | 0.895  | 0.83 [0.54, 1.27] | -0.19 | 0.391     |
| in the area of  |                             | 1.52]             |        |       |        |                   |       |           |
| residence       | High                        | 1.11 [0.70, 1.77] | 0.10   | 0.663 |        | 0.96 [0.61, 1.51] | -0.04 | 0.859     |
| Partner with    | Yes                         | 1.00 (reference)  |        |       |        | 1.00 (reference)  |       |           |
| whom to         | No                          | 1.23              | [0.81, | 0.21  | 0.339  | 1.66 [1.11, 2.47] | 0.51  | 0.013 *   |
| discuss one's   |                             | 1.88]             |        |       |        |                   |       |           |
| health          |                             |                   |        |       |        |                   |       |           |

CI, confidence interval

\* p-value < 0.05

\*\* p-value < 0.01



## DISCUSSION

Our findings indicated that many Vietnamese immigrants in Japan experienced a decrease in income and worsening working conditions during the COVID-19 pandemic. In addition, approximately half of respondents reported symptoms of depression and anxiety, which were significantly associated with medical or psychiatric co-morbidity, and low socioeconomic status in the multivariable regression analysis. Beyond these associations, symptoms of depression were associated with age, and the symptoms of anxiety were associated with the availability of partners with whom to discuss one's health. These results demonstrate that there is a mental health crisis among Vietnamese immigrants in Japan, highlighting the need for financial support and measures for preventing social isolation.

We observed a high prevalence of depression symptoms, with 61.3% and 32.7% of respondents reporting mild-to-severe and moderate-to-very severe symptoms, respectively. This prevalence is strikingly higher than previously reported values. For example, a previous study reported that only 2% of community-dwelling residents in natural disaster-prone areas in Vietnam exhibited moderate-to-severe depression based on the PHQ-9 score.[23] Further, the prevalence of depressive symptoms was greater in our study than in other studies conducted after the start of the pandemic. Porter et al. [24] reported that the prevalence of mild-to-severe depression as measured using the PHQ-8 was 9.5% among the young population, while Luong et al. [25] reported a prevalence rate of 8.7% for moderate-to-severe depression (PHQ-9 scores) among pregnant women in Vietnam. Other studies using the PHQ-9 have reported that the rate of moderate-to-severe depressive symptoms was higher among Vietnamese immigrants than among Japanese citizens: 17.9% among adults aged 18 years and older;[26] 11.6% among college students;[27] and 14.8% among hospital workers.[28] Together, the current evidence indicates that rates of depressive symptoms among Vietnamese immigrants in Japan are similar to those for other immigrant populations in the country. However, such symptoms appear to be more severe than those among Japanese and Vietnamese individuals living in their home countries.

We observed a high prevalence of anxiety symptoms in the current study, with 45.9% and 18.7% of respondents reporting mild-to-severe and moderate-to-severe anxiety symptoms, respectively. A previous study reported that only 33.1% and 5.5% of clinical health care workers in Vietnam experienced mild-to-severe and moderate-to-severe symptoms of anxiety, respectively.[18] Another recent study noted that 25.5% and 4.3% of healthcare workers in Vietnam exhibited mild-to-severe and moderate-to-severe anxiety symptoms, respectively.[14] Ueda et al. [29] reported mild-to-severe symptoms of anxiety in 31.6% of Japanese people 18 years and older, based on GAD-7 scores. As observed for depressive symptoms, the prevalence of anxiety appears to be similar between Vietnamese immigrants and other immigrant populations in Japan, with immigrants experiencing more severe symptoms than Japanese and Vietnamese individuals living in their home countries.

The World Health Organization recently reported that economic problems have affected the mental health of migrants during the COVID-19 pandemic.[30] In December 2020, approximately 46,000 foreigners living in Japan were laid off, unable to continue working, or unable to return home,[4] many of whom were likely Vietnamese. In this survey, 60.4% of participants reported a slightly difficult or worse economic situation relative to the pre-pandemic period, while 14.2% reported a severe change in economic status, indicating that Vietnamese immigrants in Japan remain anxious about their current and future lives in Japan. The Ministry of Health, Labour, and Welfare (Japan) has been providing financial support including a welfare fund loan system, public assistance, counselling, support for finding employment, and support for early return to the home country;[4,31,32] however, there have been no positive outcomes. Nonetheless, there is a need to continue supporting the economic and daily life of Vietnamese immigrants in Japan since worsening economic situations and instability in daily life are strongly associated with mental health status.

Additionally, our findings demonstrated that the presence of medical or psychiatric comorbidities significantly impacts mental health among Vietnamese immigrants in Japan. Among the most important health issues in Japan is the health disparity among immigrants living in Japan given the lack of access to medical services.[33] Another report on immigrants in Japan who participated in free medical check-ups conducted by a Non-Governmental Organization revealed that many were not connected to medical services.[34] Fear of COVID-19 has also generally reduced the number of people receiving medical services in Japan.[35] The COVID-19 pandemic further restricted access to medical services among immigrants in Japan, including Vietnamese residents, which might contribute to increases in their anxiety.

Our analysis also revealed that age differences have a significant impact on depressive symptoms. The result was that depressive symptoms were less likely to occur with increasing age. This means that young people are at high risk. Similar reports have been seen in Vietnam and Japan under the COVID-19 pandemic;[24,36] therefore, this result may not be a characteristic issue for Vietnamese immigrants in Japan. However, young Vietnamese individuals in Japan find it difficult to respond to changes in their living environment due to COVID-19 pandemic, which is expected to lead to an increase in their depressive symptoms. Our analysis also revealed that being single and absence of partners with whom to discuss one's health significantly affected the risk of experiencing symptoms of anxiety. The Immigration Services Agency of Japan reported that foreigners living in Japan had few connections with others outside of work.[37] A South Korean study conducted in October 2020 reported that immigrants who live alone have moderate-to-extreme anxiety symptoms when compared with those living with their families.[9] These findings indicate that connections with others, especially family members, are important for maintaining mental health among immigrants. Thus, Vietnamese immigrants in Japan will require further support to connect with their families, Vietnamese friends, and others during the remainder of the COVID-19 pandemic.

The present study had some limitations, including its self-reported and retrospective nature, which may have introduced recall bias. In addition, the survey may not be fully representative of the Vietnamese population living in Japan since some older adults of Vietnamese people may not have been able to participate using the online format. Therefore, further studies involving in-person surveys and Japanese forms of the questionnaire are warranted. Nonetheless, we attempted to reduce the risk of bias by controlling for potential confounders using multivariable logistic regression analysis.

## CONCLUSIONS

In this cross-sectional survey, we examined the mental health status of 621 Vietnamese immigrants living in Japan during the COVID-19 pandemic. Our analysis yielded the following five main findings: (1) many Vietnamese immigrants experienced economic difficulties; (2) symptoms of depression (moderate-to-very-severe) and anxiety (mild-to-severe) were observed in 32.7% and 45.9% of respondents; (3) low socioeconomic status, and medical or psychiatric co-morbidity were associated with depression and anxiety; (4) younger age are more likely to have depressive symptoms and (5) being single and absence of partners with whom to discuss one's health were associated with anxiety. Together, our findings demonstrate that mental health status is worse among Vietnamese immigrants than among Japanese citizens during the COVID-19 pandemic, and that there is a continued need for financial support and measures that can prevent social isolation among them.

## Acknowledgments

We wish to extend special thanks to all the respondents who participated in the survey. We also thank Professor Hiroya Matsuo for his helpful advice.

## Funding

This work was supported by JSPS KAKENHI (Grant Number JP19K11277).

## Author contributions

T. Y. conceived the original idea for the study. T. Y., P. N. Q., S. I., and K. K. designed the questionnaire. T. Y., C. Y., and K. K. analysed the data and wrote the first draft of the manuscript. P. N. Q., N. E., E. S., C. Y., S. I., K. S., and K. K. contributed to the interpretation of the results. All authors made substantial intellectual contributions to the study and approved the final draft of the manuscript.

## Data availability

The data that support the findings of this study are available from the corresponding author upon reasonable request.

## **Declaration of interest**

None.

## References

- 1 Immigration Services Agency of Japan. Number of foreign residents as of the End of June 2021. 2021. [https://www.moj.go.jp/isa/publications/press/13\\_00017.html](https://www.moj.go.jp/isa/publications/press/13_00017.html) (accessed 24 Feb 2022).
- 2 Kiyofuji R. Peace of mind for Buddhist Vietnamese technical intern trainees: Based on PAC (personal attitude construct) analysis in the local Japanese language school (in Japanese). *Bulletin of the Graduate School of Integrated Sciences for Global Society. Kyushu University* 2021;28:1–14.
- 3 Ministry of Health, Labour, and Welfare (Japan). Incidence of COVID-19 in Japan. 2022. <https://www.mhlw.go.jp/stf/covid-19/kokunainohasseijoukyou.html> (accessed 24 Feb 2022).
- 4 Ministry of Health, Labour, and Welfare (Japan). Report on the Emergency Response Policy for foreign residents in Japan in poverty. 2021. <https://www.mhlw.go.jp/content/12401000/000755666.pdf> (accessed 24 Feb 2022).
- 5 Galletly CL, Lechuga J, Dickson-Gomez JB, et al. Assessment of COVID-19–Related immigration concerns among Latinx immigrants in the US. *JAMA Netw Open* 2021;4(7):e2117049. doi: 10.1001/jamanetworkopen.2021.17049.
- 6 Evra R, Mongrain E. Mental Health Status of Canadian Immigrants During the COVID-19 Pandemic. 2020. <https://www150.statcan.gc.ca/n1/pub/45-28-0001/2020001/article/00050-eng.htm> (accessed 24 Feb 2022).
- 7 Spiritus-Beerden E, Verelst A, Devlieger I, et al. Mental health of refugees and migrants during the COVID-19 pandemic: The role of experienced discrimination and daily stressors. *Int J Environ Res Public Health* 2021;18(12):6354. doi: 10.3390/ijerph18126354.
- 8 Choudhari R. COVID 19 pandemic: Mental health challenges of internal migrant workers of India. *Asian J Psychiatr* 2020;54:102254. doi: 10.1016/j.ajp.2020.102254.
- 9 Acharya SR, Moon DH, Chun JH, et al. COVID-19 and mental health: Anxiety disorders among immigrants due to COVID-19 outbreak in South Korea. *Int J Psychiatry Med* 2021;912174211042695. doi:10.1177/00912174211042695.
- 10 Teng Y, Takemoto K. Associations between psychological conditions and social capital among Chinese international students in Japan during the COVID-19 pandemic. *J Disaster Res* 2022;17(1):136–43.
- 11 Hu and Umeda. Stress, Anxiety, and Depression for Chinese Residents in Japan during the COVID-19 Pandemic. *Int J Environ Res Public Health* 2021; 18(9):4958. doi: 10.3390/ijerph18094958.
- 12 The World Bank. Individuals Using the Internet (% of Population) – Vietnam. 2022. <https://data.worldbank.org/indicator/IT.NET.USER.ZS?locations=VN> (accessed 24 Feb 2022).

- 13 Do BN, Nguyen PA, Pham KM, et al. Determinants of health literacy and its associations with health-related behaviors, depression among the older people with and without suspected COVID-19 symptoms: A multi-institutional study. *Front Public Health* 2020;8,581746. doi: 10.3389/fpubh.2020.581746.
- 14 Doan QH, Tran NN, Than MH, et al. Depression, anxiety and associated factors among frontline hospital healthcare workers in the fourth wave of COVID-19: Empirical findings from Vietnam. *Trop Med Infect Dis* 2021;7(1):3. doi: 10.3390/tropicalmed7010003.
- 15 Nguyen HC, Nguyen MH, Do BN, et al. People with suspected COVID-19 symptoms were more likely depressed and had lower health-related quality of life: The potential benefit of health literacy. *J Clin Med* 2020;9(4):965. doi: 10.3390/jcm9040965.
- 16 Pham T, Bui L, Nguyen A, et al. The prevalence of depression and associated risk factors among medical students: An untold story in Vietnam. *PLOS ONE* 2019;14(8):e0221432. doi: 10.1371/journal.pone.0221432.
- 17 Pham KM, Pham LV, Phan DT, et al. Healthy dietary intake behavior potentially modifies the negative effect of COVID-19 lockdown on depression: A hospital and Health Center Survey. *Front Nutr* 2020;7:581043. doi: 10.3389/fnut.2020.581043.
- 18 Quang LN, Kien NT, Anh PN, et al. The level of expression of anxiety and depression in clinical health care workers during the COVID-19 outbreak in 2 hospitals in Hanoi, Vietnam. *Health Serv Insights* 2021;14,11786329211033245. doi: 10.1177/11786329211033245.
- 19 Spitzer RL, Williams JB, Kroenke KJ. Test review: Patient health Questionnaire–9 (PHQ-9). *Rehabil Couns Bull* 2014;57(4):246–8.
- 20 Spitzer RL, Kroenke K, Williams JB, et al. A brief measure for assessing generalized anxiety disorder: The GAD-7. *Arch Intern Med* 2006;166(10):1092–7. doi: 10.1001/archinte.166.10.1092.
- 21 Breslau J, Borges G, Tancredi D, et al. Migration from Mexico to the United States and subsequent risk for depressive and anxiety disorders: A cross-national study. *Arch Gen Psychiatry* 2011;68(4):428–33. doi: 10.1001/archgenpsychiatry.2011.21.
- 22 Zhang J, Le Fang YW, Wiecek WF. Depression, anxiety, and suicidal ideation among Chinese Americans: A study of immigration-related factors. *J Nerv Ment Dis* 2013;201(1):17–22. doi: 10.1097/NMD.0b013e31827ab2e2.
- 23 Pollack AA, Weiss B, Trung LT. Mental health, life functioning and risk factors among people exposed to frequent natural disasters and chronic poverty in Vietnam. *B J Psych Open* 2021;2(3):221–32. doi: 10.1192/bjpo.bp.115.002170.
- 24 Porter C, Favara M, Hittmeyer A, et al. Impact of the COVID-19 pandemic on anxiety and depression symptoms of young people in the global south: Evidence from a four-country cohort study. *BMJ Open* 2021;11(4):e049653. doi: 10.1136/bmjopen-2021-049653.
- 25 Luong TC, Pham TT, Nguyen MH, et al. Fear, anxiety and depression among pregnant women during COVID-19 pandemic: Impacts of healthy eating behaviour and health literacy.

- Ann Med* 2021;53(1):2120–31. doi: 10.1080/07853890.2021.2001044.
- 26 Yamamoto T, Uchiumi C, Suzuki N, et al. The psychological impact of ‘mild lockdown’ in Japan during the COVID-19 pandemic: A nationwide survey under a declared state of emergency. *Int J Environ Res Public Health* 2020;17(24):9382. doi: 10.3390/ijerph17249382.
- 27 Nomura K, Minamizono S, Maeda E, et al. Cross-sectional survey of depressive symptoms and suicide-related ideation at a Japanese national university during the COVID-19 stay-home order. *Environ Health Prevent Med* 2021;26(1):1–9. doi: 10.1186/s12199-021-00953-1.
- 28 Miki T, Yamamoto S, Fukunaga A, et al. Association between eating balanced meals and depressive symptoms in Japanese hospital workers during the COVID-19 pandemic. *Neuropsychopharmacol Rep* Published Online First: 2 Feb 2022. doi:10.1002/npr2.12230
- 29 Ueda M, Stickley A, Sueki H, et al. Mental health status of the general population in Japan during the COVID-19 pandemic. *Psychiatr Clin Neurosci* 2020;74:505–6. doi: 10.1111/pcn.13105.
- 30 World Health Organization. Mental Health and Forced Displacement. 2021. <https://www.who.int/news-room/fact-sheets/detail/mental-health-and-forced-displacement> (accessed 24 Feb 2022).
- 31 Ministry of Health, Labour, and Welfare (Japan). Guidance on Temporary Loan Emergency Funds. 2021. <https://corona-support.mhlw.go.jp/seikatsufukushi/en/index.html> (accessed 24 Feb 2022).
- 32 Ministry of Health, Labour and Welfare (Japan). Monetary Assistance for Everyday Lives. 2021. <https://www.mhlw.go.jp/content/000743778.pdf> (accessed 24 Feb 2022).
- 33 Yasukawa K, Sawada T, Hashimoto H, et al. Health-care disparities for foreign residents in Japan. *Lancet* 2019;393(10174):873–874. doi: 10.1016/S0140-6736(19)30215-6.
- 34 Higuchi M, Endo M, Yoshino A. Factors associated with access to health care among foreign residents living in Aichi Prefecture, Japan: Secondary data analysis. *Int J Equity Health* 2021;20(1):135. doi: 10.1186/s12939-021-01465-8.
- 35 Makiyama K, Kawashima T, Nomura S, et al. Trends in healthcare access in Japan during the first wave of the COVID-19 pandemic, up to June 2020. *Int J Environ Res Public Health* 2021;18(6):3271. doi: 10.3390/ijerph18063271.
- 36 Fukase Y, Ichikura K, Murase H, et al. Age-related differences in depressive symptoms and coping strategies during the COVID-19 pandemic in Japan: A longitudinal study. *J Psychosom Res* 2022;155: 110737. doi:10.1016/j.jpsychores.2022.110737
- 37 Immigration Services Agency of Japan. Basic survey on foreign residents in Japan Report in 2020. 2021. <https://www.moj.go.jp/isa/content/001341984.pdf> (accessed 24 Feb 2022).
